# Supplementary material for: On the use of electromagnetic waves as means of power supply in wireless sensor networks
Source: Springer Nature journal article supplement (doi:10.1186/1687-1499-2014-36), 2014-03-07

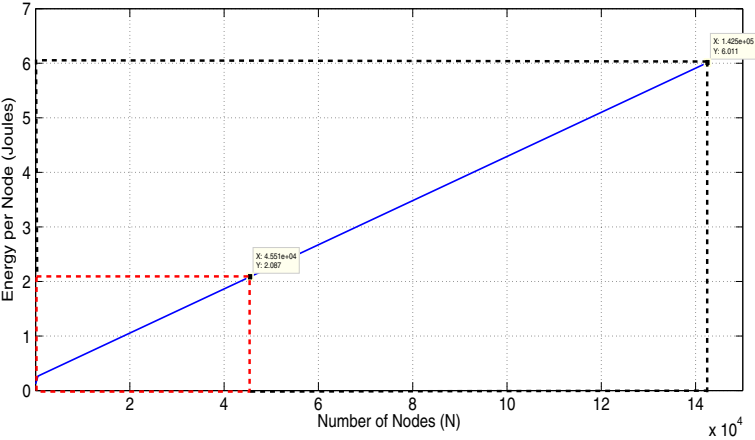

Supplement: 13638_2013_1037_MOESM11_ESM.pdf [file 13638_2013_1037_MOESM11_ESM.pdf]
