# Supplementary material for: On the use of electromagnetic waves as means of power supply in wireless sensor networks
Source: Springer Nature journal article supplement (doi:10.1186/1687-1499-2014-36), 2014-03-07
Supplement: 13638_2013_1037_MOESM13_ESM.pdf [file 13638_2013_1037_MOESM13_ESM.pdf]

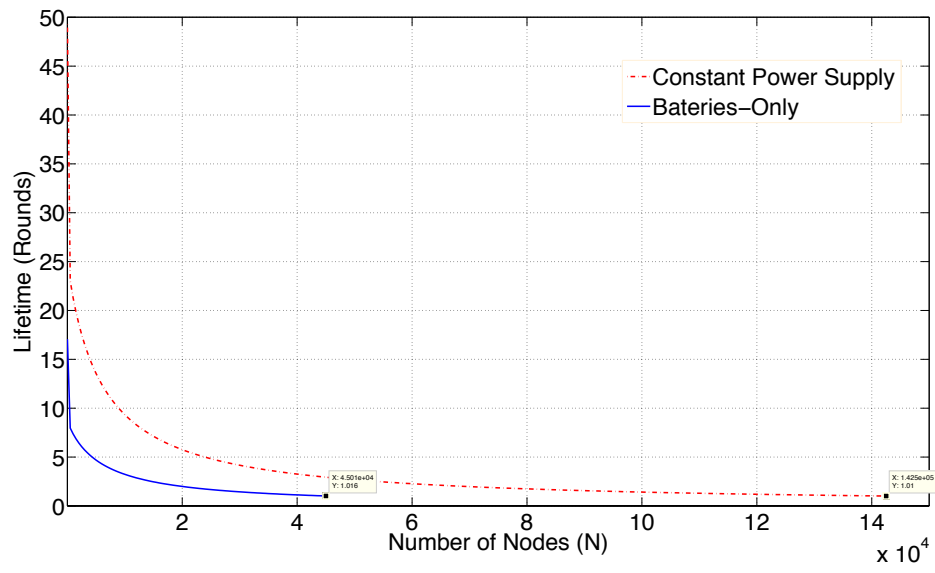

Fig. 12. System Lifetime for Different Number of Nodes in the Network.
